# Supplementary material for: A simple redox model of low-T NO + CO adsorption onto Pd-CHA as effective passive NOx adsorbers
Source: Royal Society of Chemistry journal article supplement (doi:10.1039/d4re00324a), 2024-11-18
Supplement: d4re00324a1.pdf [file d4re00324a1.pdf]

**A simple redox model of low-T NO + CO adsorption  
onto Pd-CHA as effective Passive NO<sub>x</sub> Adsorbers**

Umberto Iacobone<sup>1</sup>, Andrea Gjetja<sup>1</sup>, Nicola Usberti<sup>1</sup>,  
Isabella Nova<sup>1</sup>, Enrico Tronconi<sup>1,\*</sup>

*<sup>1</sup>Laboratory of Catalysis and Catalytic Processes, Dipartimento di Energia,  
Politecnico di Milano, Via La Masa 34, I-20156, Milano, Italy*

Djamela Bounechada<sup>2</sup>, Roberta Villamaina<sup>2</sup>, Maria Pia Ruggeri<sup>2</sup>, Andrew P. E. York<sup>2</sup>,  
Loredana Mantarosie<sup>2</sup>, Jillian Collier<sup>2</sup>

*<sup>2</sup>Johnson Matthey Technology Centre, Blounts Court Road,  
Sonning Common, Reading RG4 9NH, UK*

**Supporting Information**

\* Corresponding author: Tel.: +39 02 23993264

E-mail address: [enrico.tronconi@polimi.it](mailto:enrico.tronconi@polimi.it)

## Apparent rate constants

| 0.84% Pd    | T = 100°C | T = 120°C | T = 150°C | T = 200°C  |            |
|-------------|-----------|-----------|-----------|------------|------------|
| $k_1$       | 0.004     | 0.004     | 0.004     | 0.004      | $[s^{-1}]$ |
| $k_2$       | 0.080     | 0.080     | 0.080     | 0.080      | $[s^{-1}]$ |
| $k_3$       | 0.030     | 0.030     | 0.030     | 0.030      | $[s^{-1}]$ |
| $k_4^{ads}$ | 0.035     | 0.035     | 0.065     | 0.085      | $[s^{-1}]$ |
| $k_4^{des}$ | 0.005     | 0.008     | 0.050     | 0.100      | $[s^{-1}]$ |
| $k_5^{dry}$ | 0.003     | 0.005     | 0.020     | 0.035      | $[s^{-1}]$ |
| $k_6^{dry}$ | 0.7 E-04* | 2.0 E-04* | 9.5 E-04* | 72.3 E-04* | $[s^{-1}]$ |
| $k_7$       | 3.0 E-04  | 7.0 E-04  | 35.0 E-04 | 200.0 E-04 | $[s^{-1}]$ |
| $k_5^{wet}$ | 0.003     | 0.005     | 0.050     | 0.120      | $[s^{-1}]$ |
| $k_6^{wet}$ | 0.0 E-04  | 1.0 E-04  | 4.0 E-04  | 6.0 E-04   | $[s^{-1}]$ |

**Table SI.1** Apparent rate constants for the 0.84% Pd sample. The estimates for  $k_5$  and  $k_6$  in wet conditions are reported at the bottom of the table. \*Extrapolated from the Arrhenius equation.

| 0.50% Pd    | T = 100°C |            |
|-------------|-----------|------------|
| $k_1$       | 0.00252   | $[s^{-1}]$ |
| $k_2$       | 0.080     | $[s^{-1}]$ |
| $k_3$       | 0.030     | $[s^{-1}]$ |
| $k_4^{ads}$ | 0.035     | $[s^{-1}]$ |
| $k_4^{des}$ | 0.005     | $[s^{-1}]$ |
| $k_5^{dry}$ | 0.0018    | $[s^{-1}]$ |
| $k_6^{dry}$ | 1.19 E-04 | $[s^{-1}]$ |
| $k_7$       | 1.79 E-04 | $[s^{-1}]$ |
| $k_5^{wet}$ | 0.0018    | $[s^{-1}]$ |
| $k_6^{wet}$ | 0.0 E-04  | $[s^{-1}]$ |

**Table SI.2** Apparent rate constants for the 0.50% Pd sample. The estimates for  $k_5$  and  $k_6$  in wet conditions are reported at the bottom of the table.

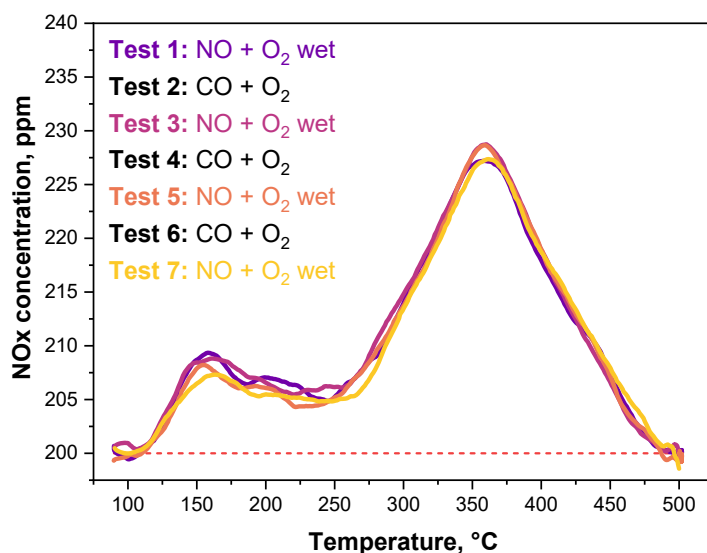

**Fig. SI.1** Replicated Temperature Programmed Surface Reaction (TPSR) runs (tests 1, 3, 5, 7) in a NO + O<sub>2</sub> + H<sub>2</sub>O atmosphere on the 0.84% Pd-CHA sample: nominal NO feed concentration (dashed line), measured outlet NO concentration (solid lines). T = 100-500 °C at 15 °C/min, W<sub>cat</sub> = 40 mg, GHSV = 300,000 cm<sup>3</sup>/h/gcat (STP). Gas feed: NO = 200 ppm, CO = 0 ppm, O<sub>2</sub> = 10 % v/v, H<sub>2</sub>O = 5 % v/v. The figure shows that exposing the catalyst repeatedly to CO + O<sub>2</sub> in tests 2, 4 and 6 (not shown) did not deactivate the catalyst.

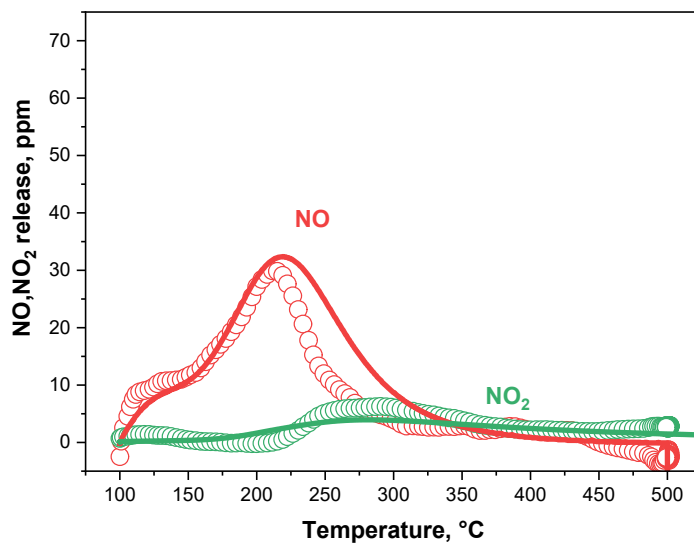

**Fig. SI.2** Temperature Programmed Surface Reaction (TPSR) run in a NO + O<sub>2</sub> dry atmosphere on the 0.84% Pd-CHA sample: measured NO release (red dots, difference between NO detected and NO fed), NO<sub>2</sub> trace (green dots), kinetic fit of NO (red solid line) and NO<sub>2</sub> (green line). T = 100-500 °C at 15 °C/min, W<sub>cat</sub> = 40 mg, GHSV = 300,000 cm<sup>3</sup>/h/gcat (STP). Feed: NO = 200 ppm, CO = 0 ppm, O<sub>2</sub> = 10 % v/v, H<sub>2</sub>O = 0 % v/v.

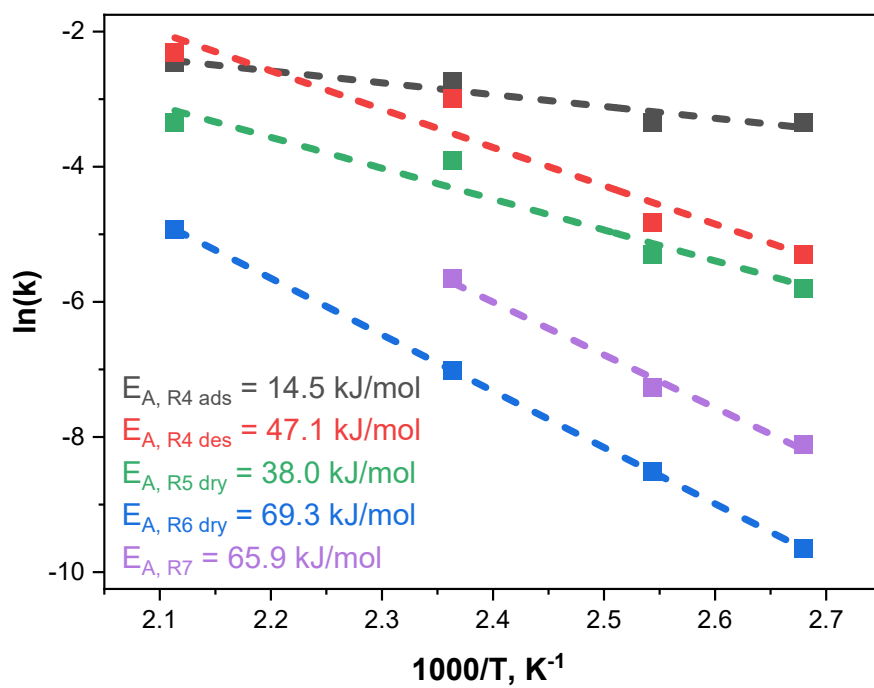

**Fig. SI.3** Arrhenius plots of the rate constants for R4ads, R4des, R5 and R6 (dry-gas) over the 0.84% Pd-CHA sample. T-range = 100–200 °C.

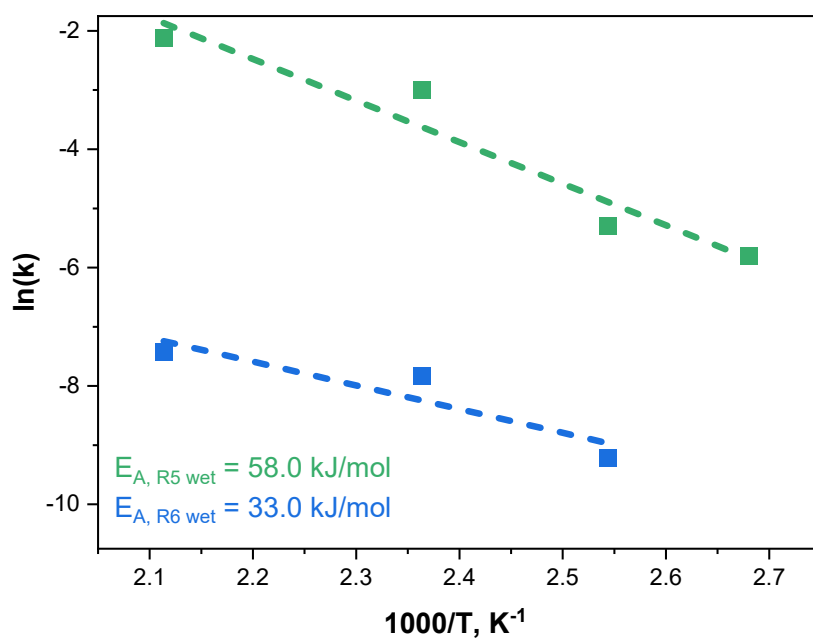

**Fig. SI.4** Arrhenius plots of the rate constants for R5 and R6 (wet feed) over the 0.84% Pd-CHA sample. T-range = 100–200 °C.

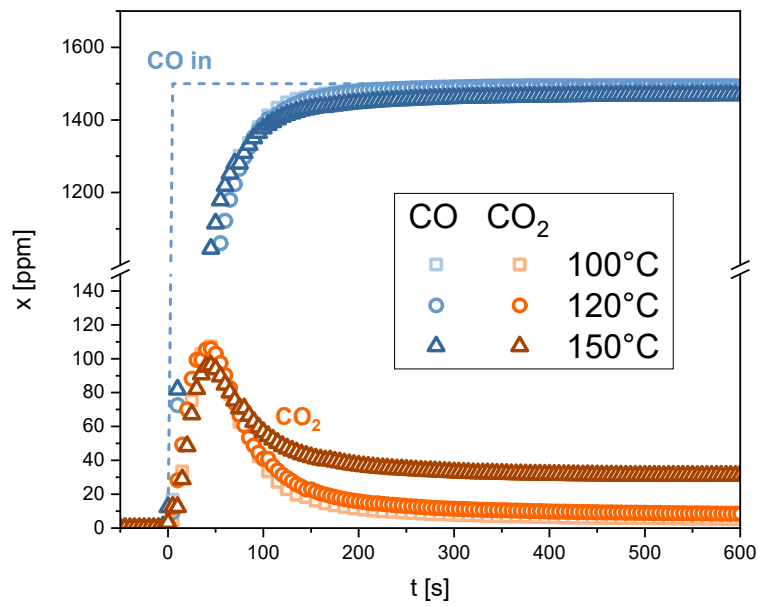

**Fig. SI.5** CO + O<sub>2</sub> feed mixture: experimental results over 0.84% Pd sample at 100 (squares), 120 (circles) and 150 °C (triangles).  $W_{\text{cat}} = 40 \text{ mg}$ ,  $GHSV = 300,000 \text{ cm}^3/\text{h}/g_{\text{cat}}$  (STP). Gas feed: CO = 1500 ppm, O<sub>2</sub> = 10% v/v, H<sub>2</sub>O = 0% v/v.

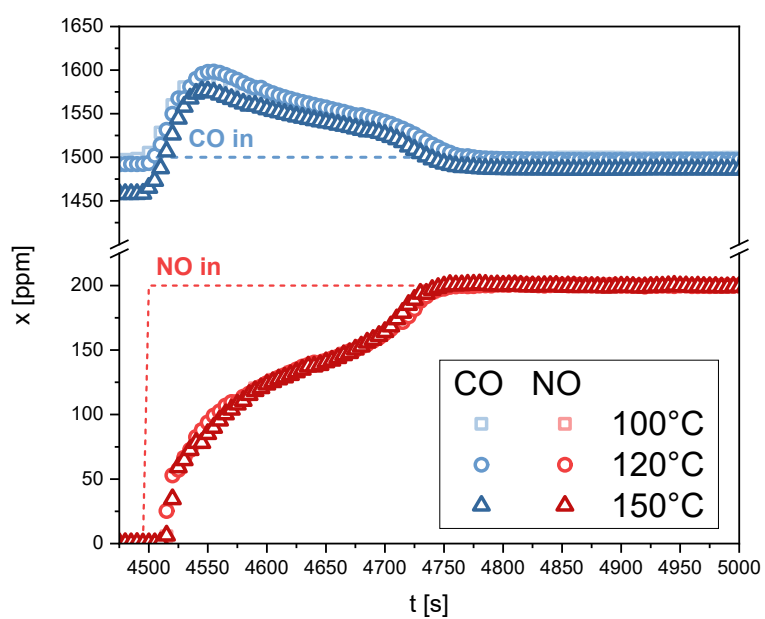

**Fig. SI.6** CO + O<sub>2</sub> + delayed NO feed mixture: experimental results over 0.84% Pd sample at 100 (squares), 120 (circles) and 150 °C (triangles).  $W_{\text{cat}} = 40$  mg,  $GHSV = 300,000$  cm<sup>3</sup>/h/g<sub>cat</sub> (STP). Gas feed: CO = 1500 ppm, NO = 200 ppm, O<sub>2</sub> = 10% v/v, H<sub>2</sub>O = 0% v/v.



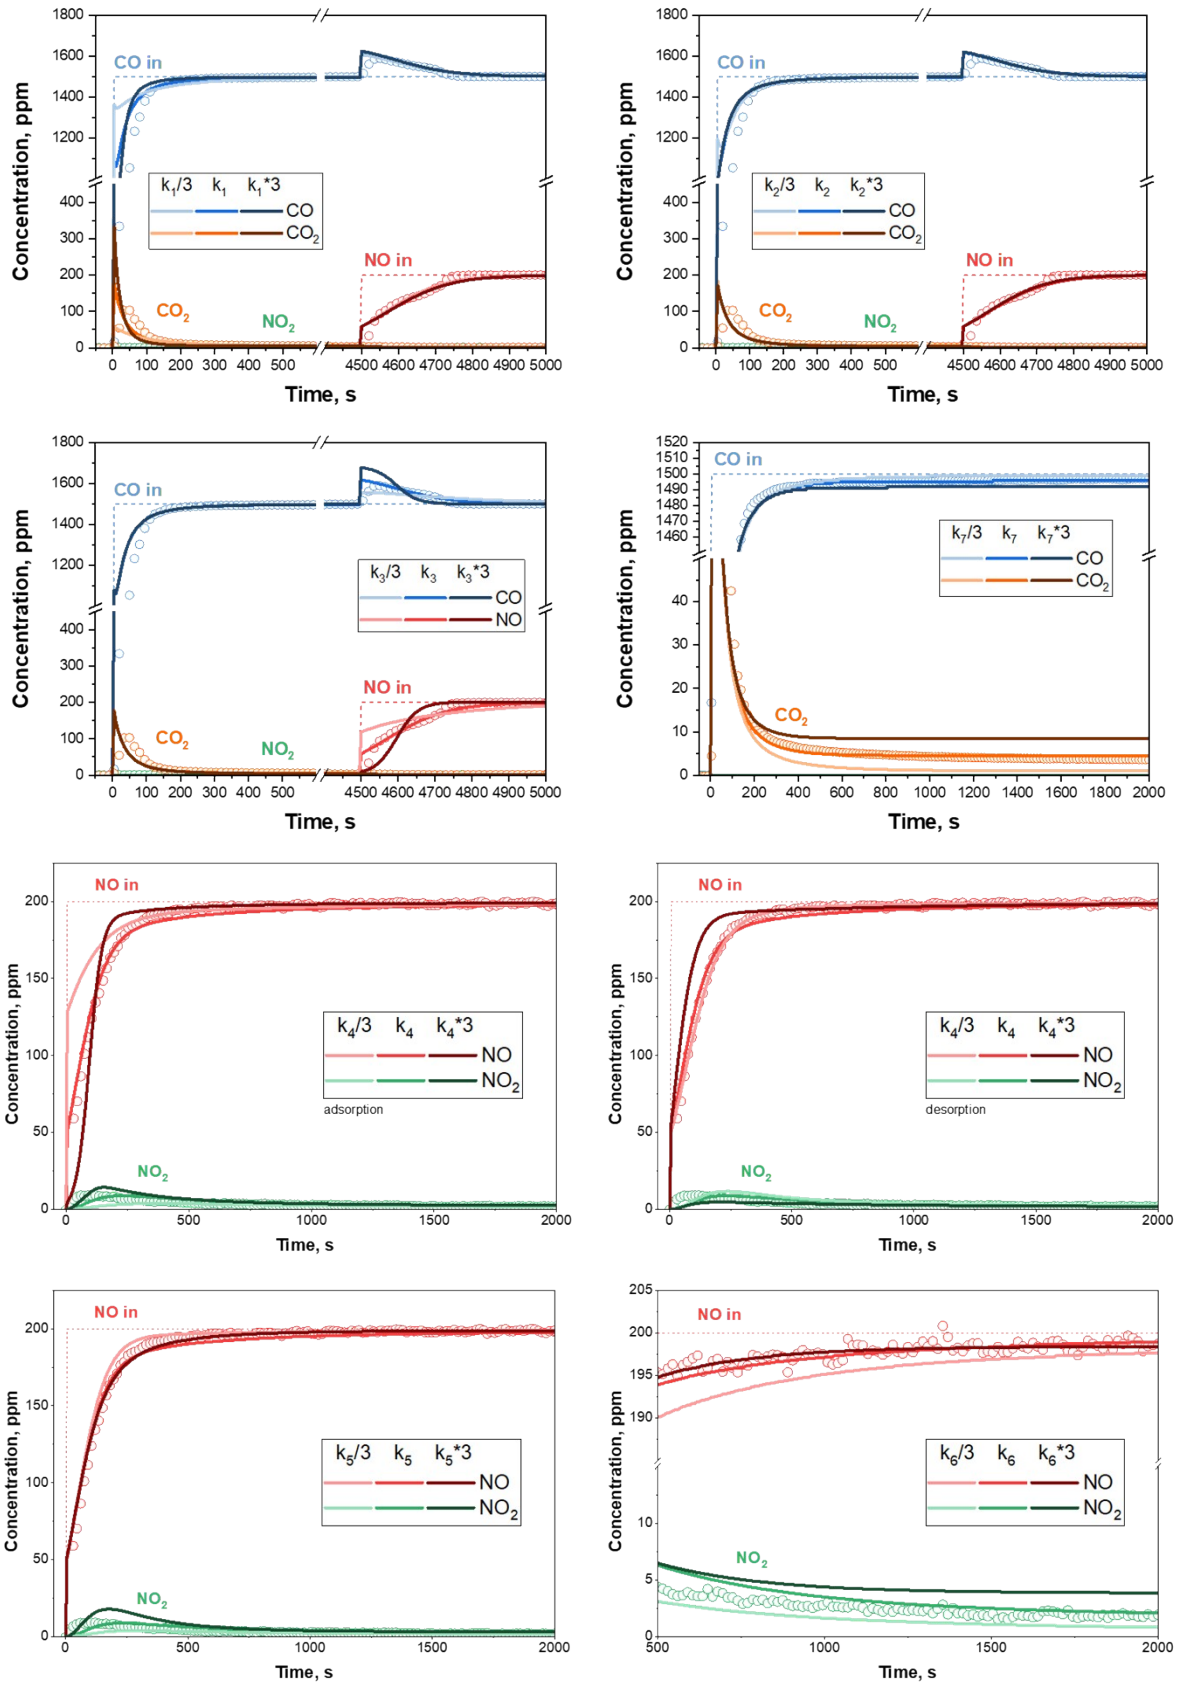

**Fig. SI.7** Sensitivity analysis for the different kinetic parameters on the test that was used for the fit. Light colors are for  $k/3$ , regular colors for the fitted  $k$  and dark colors for  $k^*3$ .
